# Supplementary material for: Pathogenic Carboxyl Ester Lipase (CEL) Variants Interact with the Normal CEL Protein in Pancreatic Cells
Source: MDPI journal article supplement (doi:10.3390/cells9010244), 2020-01-18
Supplement: s1 [file s1]

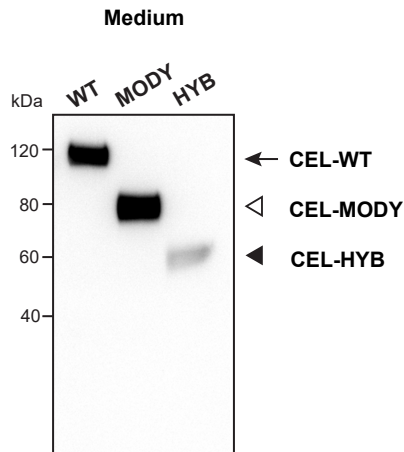

**Supplementary Figure 1. Representative western blot showing varying secretion of CEL protein variants into the medium.** HEK293 cells stably expressing CEL variants were grown for 48 h towards 80-90 % confluence. The CEL-MODY protein usually appeared more abundant in the medium than CEL-WT (see also reference [21]), whereas CEL-HYB was less well secreted. When studying CEL reuptake, we therefore used undiluted conditioned medium for CEL-HYB. For CEL-WT and CEL-MODY, the conditioned media were diluted in DMEM to 50% and 33%, respectively.
